# Supplementary material
Source: PubMed Central journal article supplement (PMC3743157)
Supplement: NIHMS53909-supplement-G.pdf [file NIHMS53909-supplement-G.pdf]

## Supplementary Figure 1

Rearrangements found on chromosome 12 in chondrosarcoma

(a) Rearrangements on chr12 identified by whole genome rearrangement screen in 6 chondrosarcomas

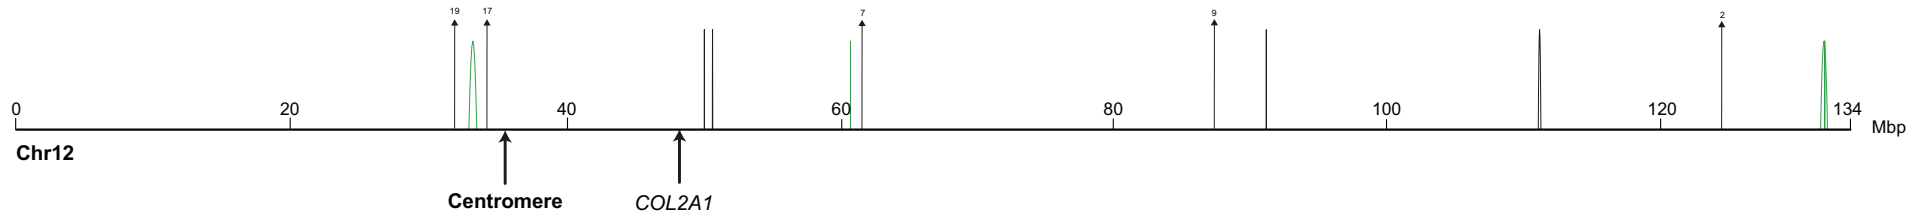

(b) COL2A1 rearrangements identified by targeted sequencing in 18 chondrosarcomas

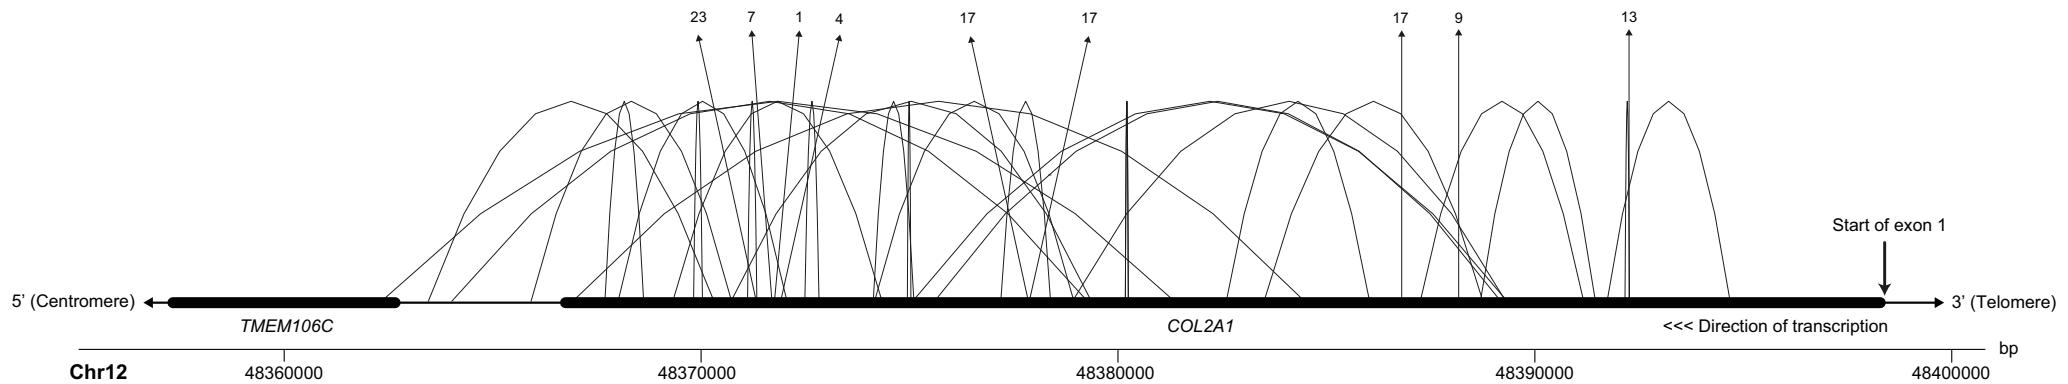

Arcs represent and connect breakpoints of intrachromosomal rearrangements. Arrows represent interchromosomal rearrangement between chromosome 12 and other chromosomes; the number above the arrowhead gives the target chromosome. Black arcs / arrows represent chondrosarcomas with *COL2A1* variants, and green arcs / arrows chondrosarcomas without *COL2A1* variants.

(a) Rearrangements on chromosome 12 in *COL2A1* mutant positive (n=4) and negative (n=2) tumours showing that no clustering of rearrangements occurs around the *COL2A1* locus. *COL2A1* rearrangements not shown.

(b) Rearrangements involving *COL2A1* showing that these are mainly contained within the gene.
