# Supplementary material
Source: PubMed Central journal article supplement (PMC3743157)
Supplement: NIHMS53909-supplement-I.pdf [file NIHMS53909-supplement-I.pdf]

### Supplementary Figure 3

Substitutions and indels identified in collagen genes in cartilage and bone tumours

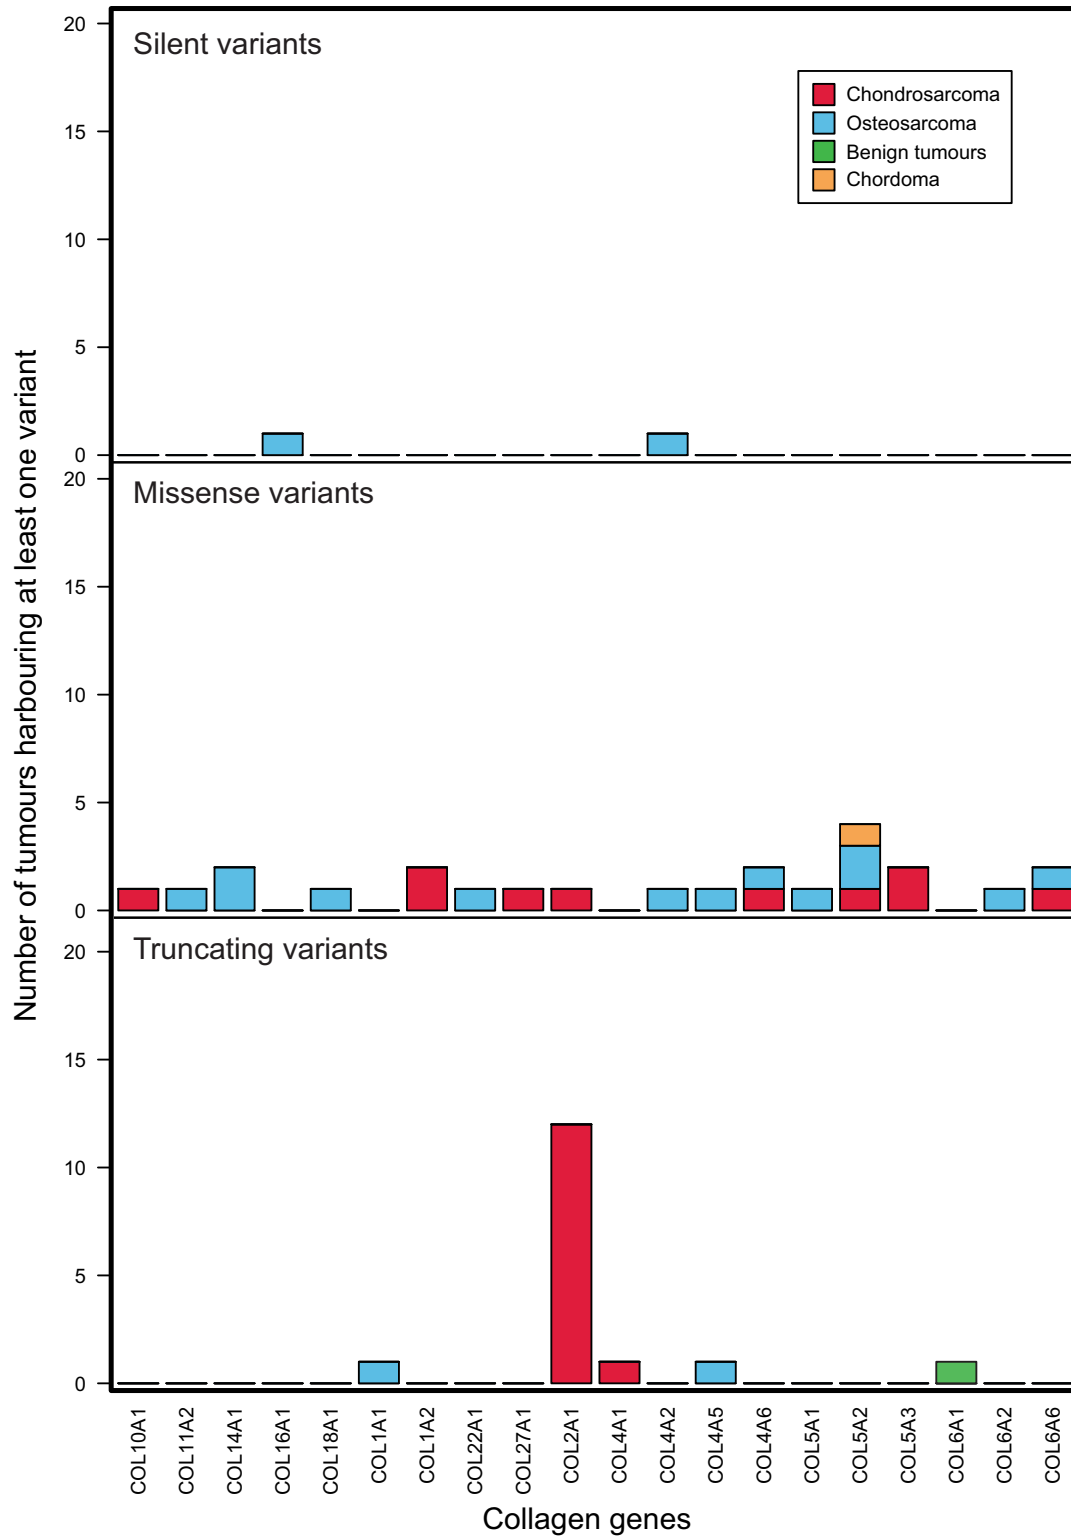

Mutations found in collagen genes in chondrosarcoma (n=49), osteosarcoma (n=56), chordoma (n=24), and benign cartilage tumours (6 chondroblastomas and 2 chondromyxoid fibromas). Mutations were screened for through whole exome sequencing in all cases bar benign cartilage tumours which were interrogated by whole genomes sequencing.
