# Supplementary material
Source: PubMed Central journal article supplement (PMC3743157)
Supplement: NIHMS53909-supplement-J.pdf [file NIHMS53909-supplement-J.pdf]

# Supplementary Figure 4: ASCAT analysis of copy number in chondrosarcoma

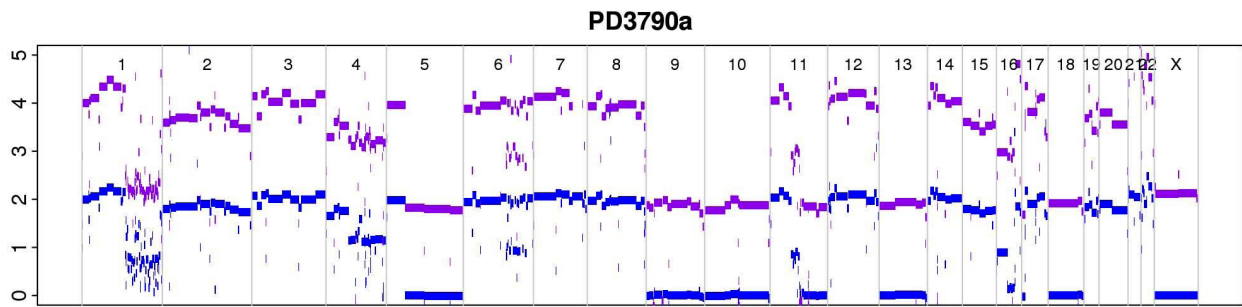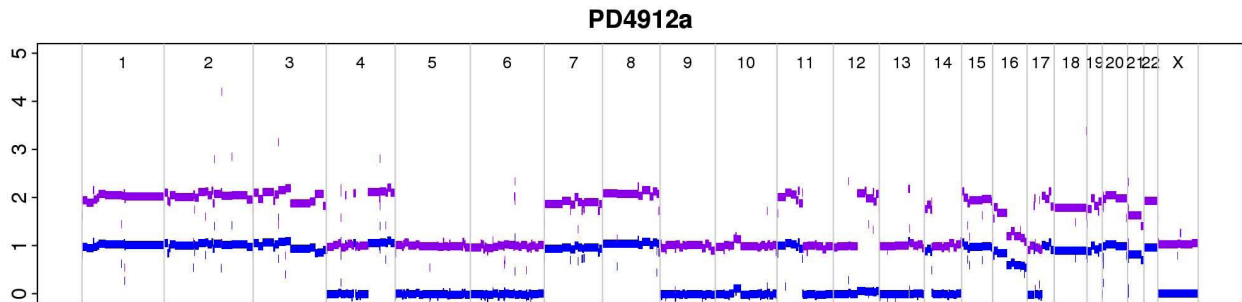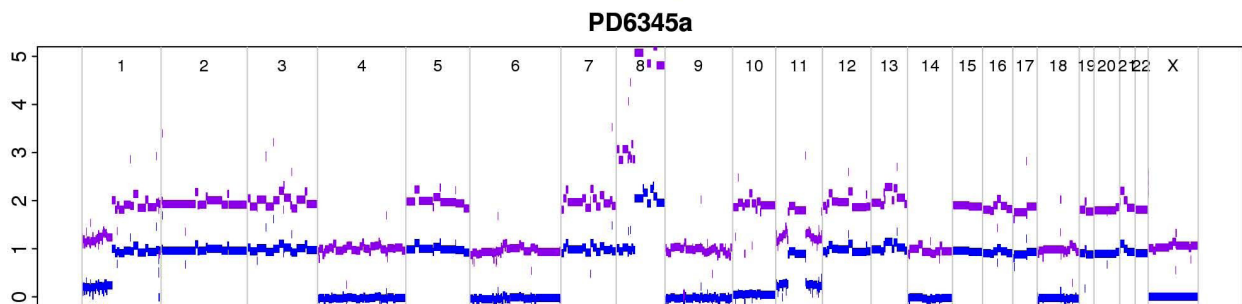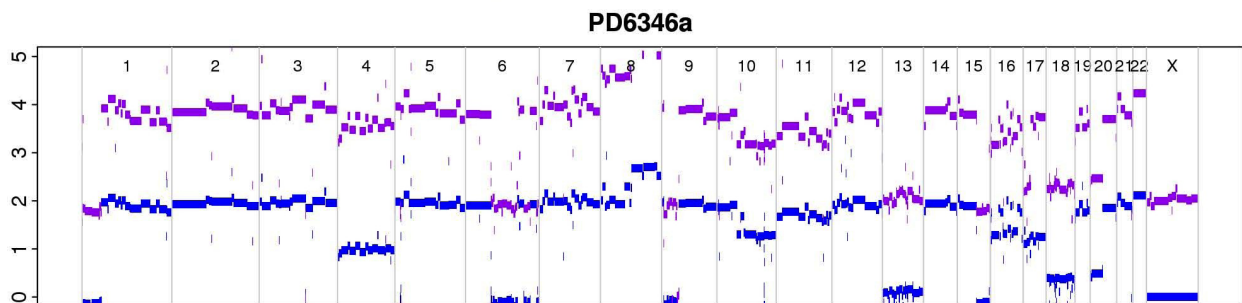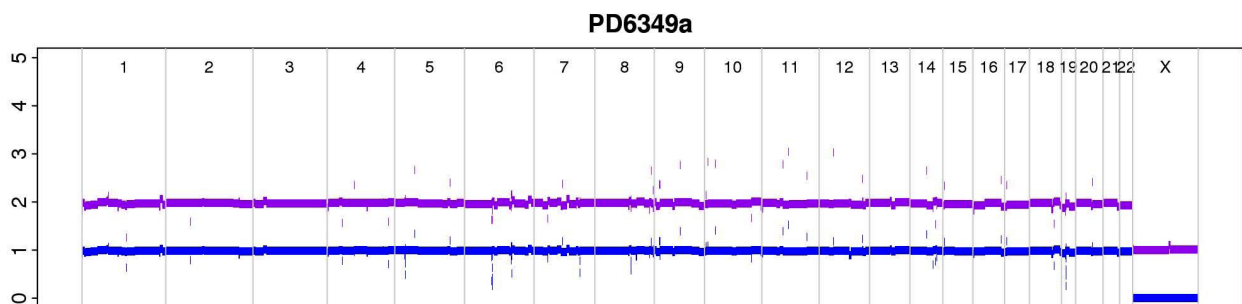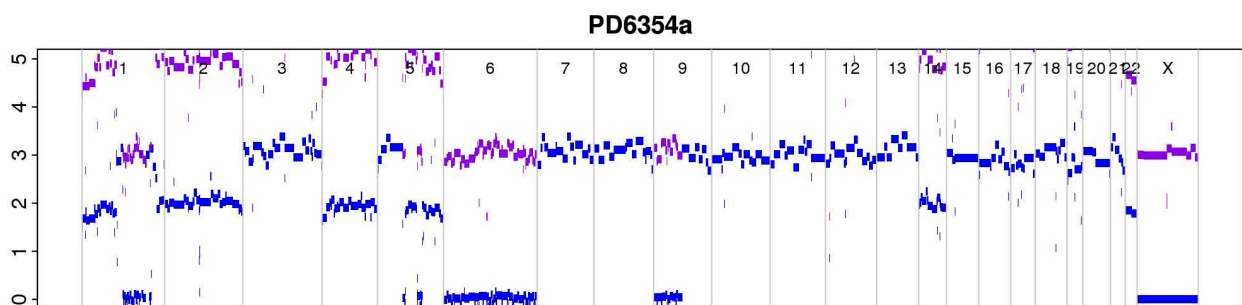

**PD6358a**

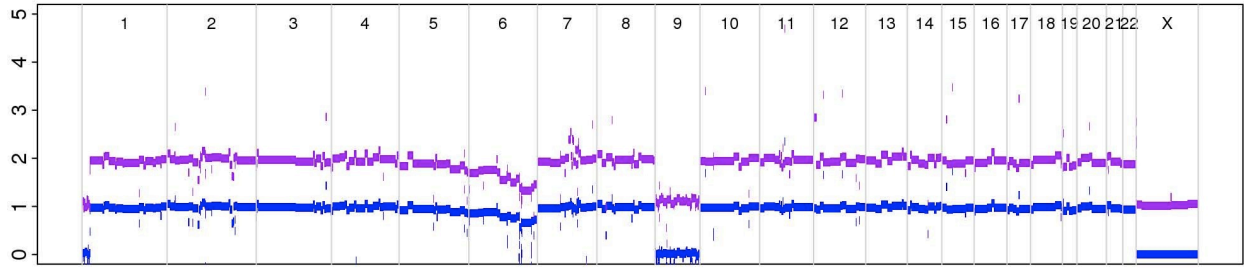

**PD6359a**

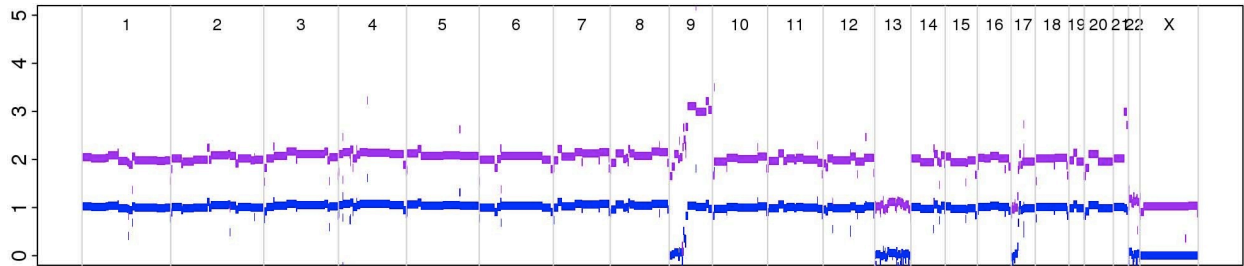

**PD6362a**

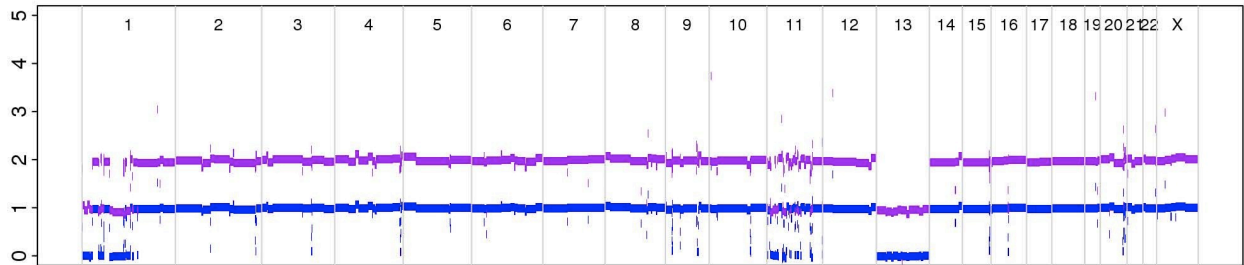

**PD6363a**

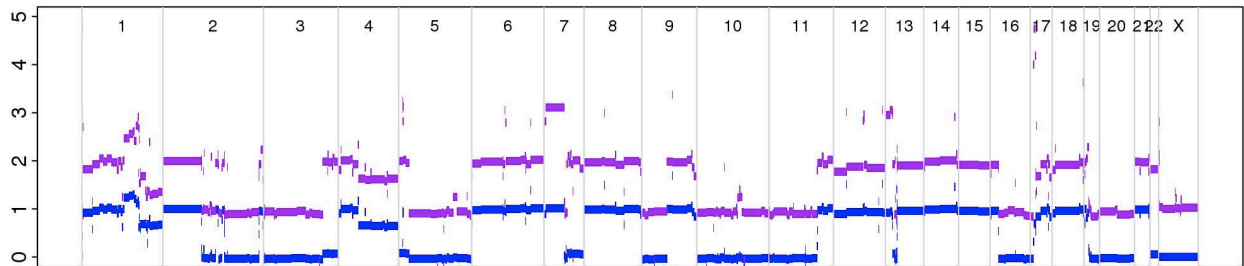

**PD6365a**

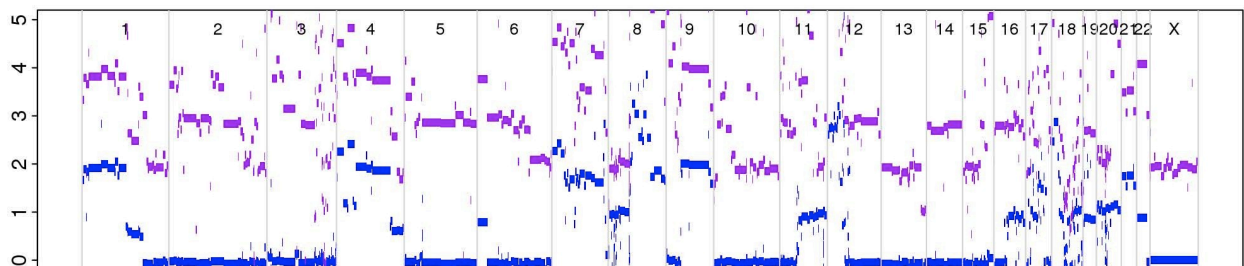

**PD6366a**

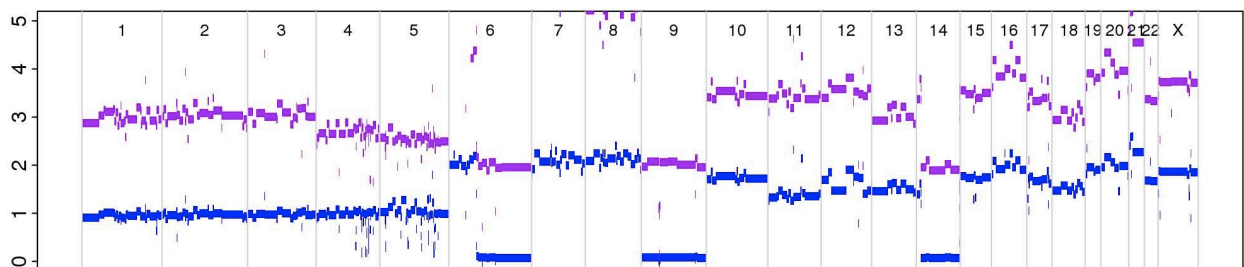

PD6367a

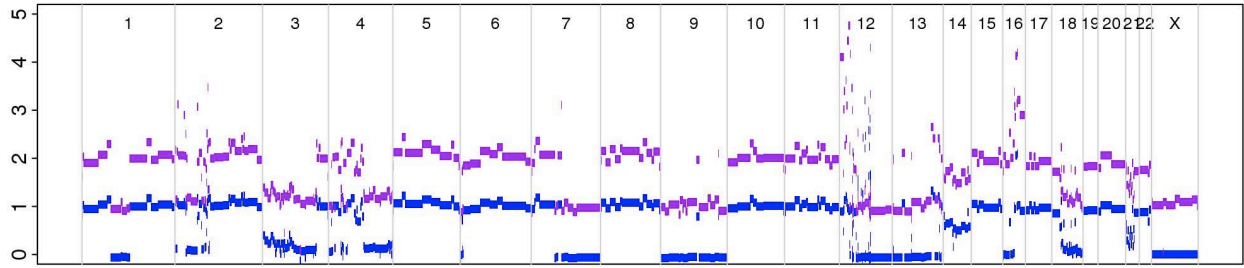

PD6744a

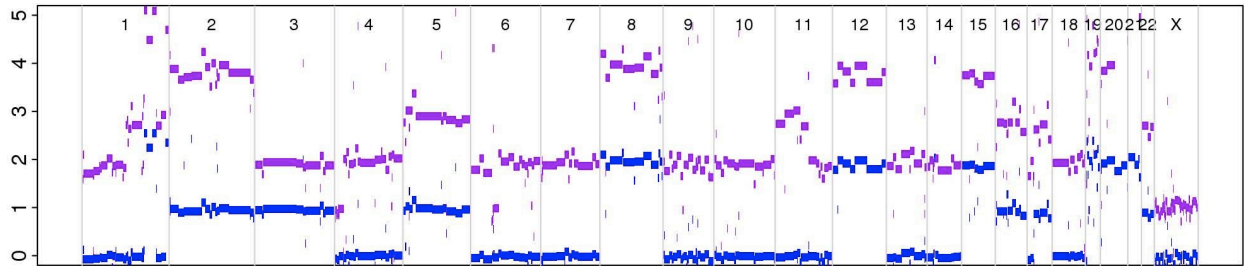

PD6745a

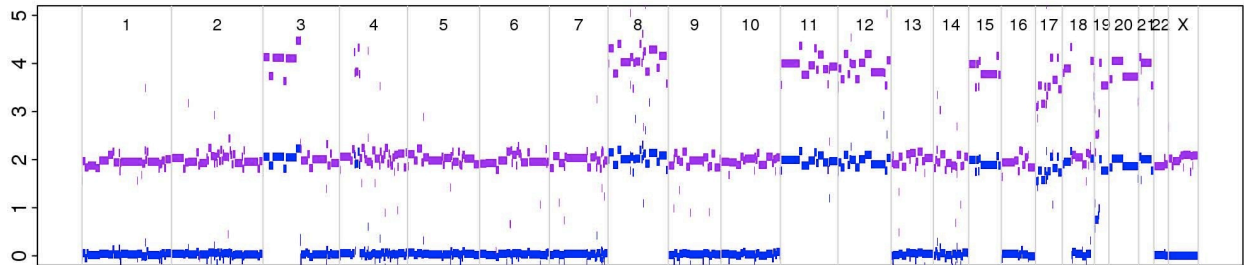

PD6746a

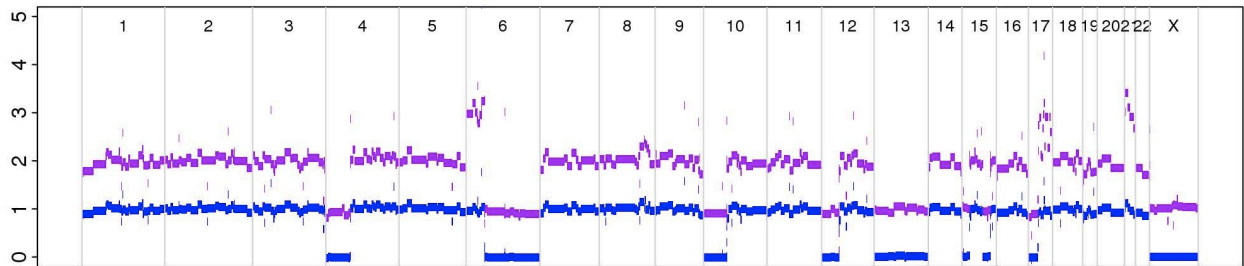

PD6747a

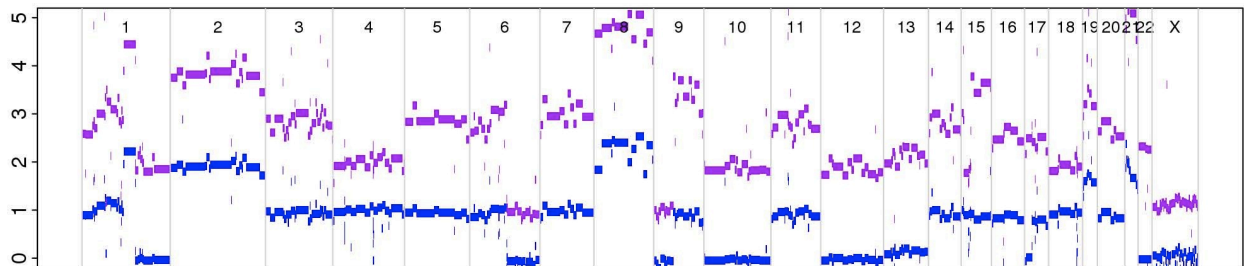

PD6748a

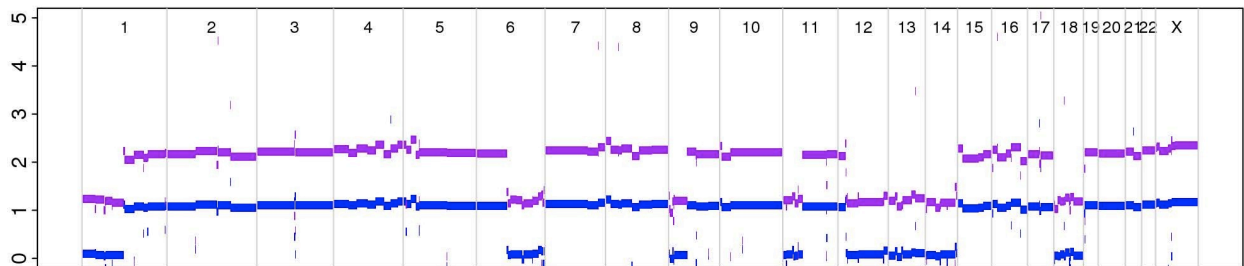



**PD6749a**

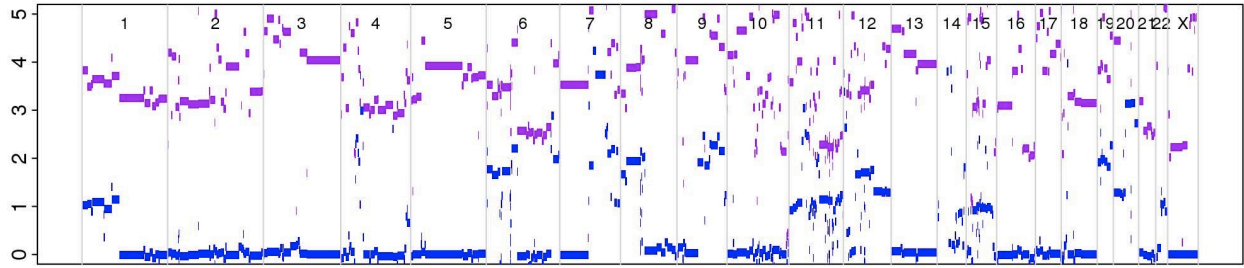

**PD6750a**

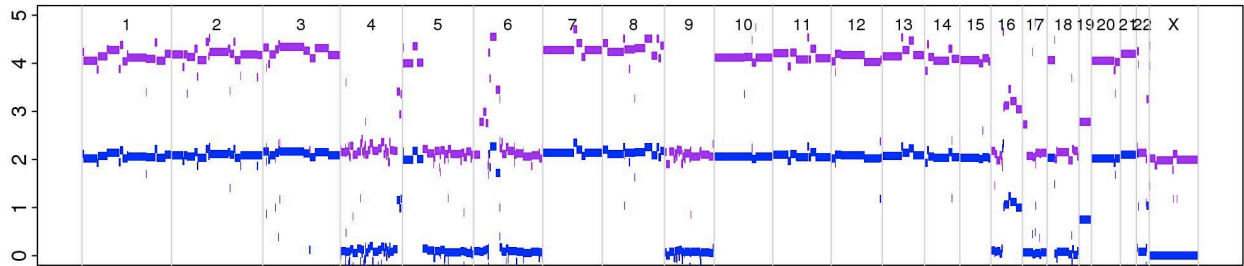

**PD6751a**

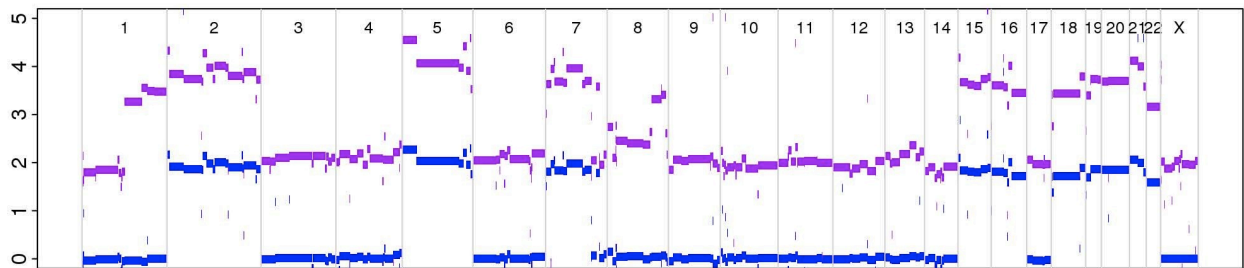

**PD6753a**

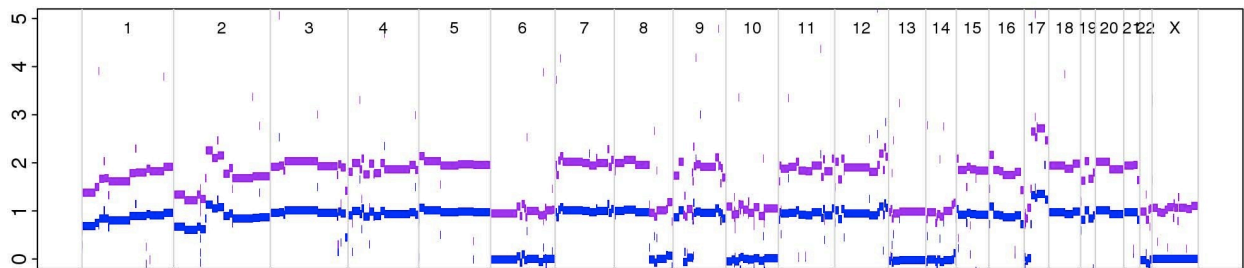

**PD6754a**

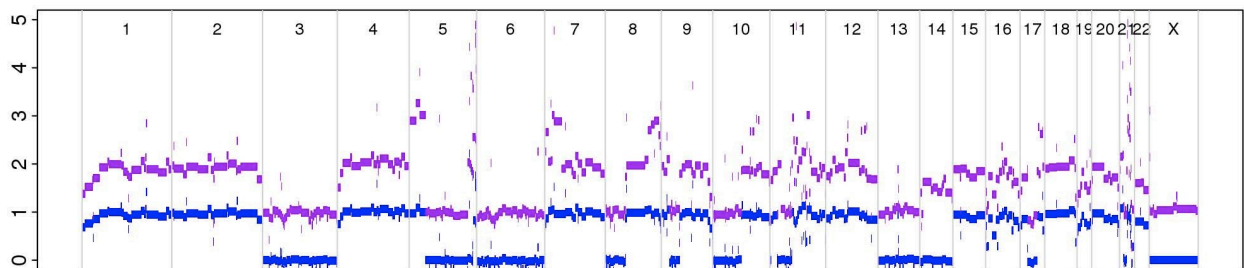

**PD6756a**

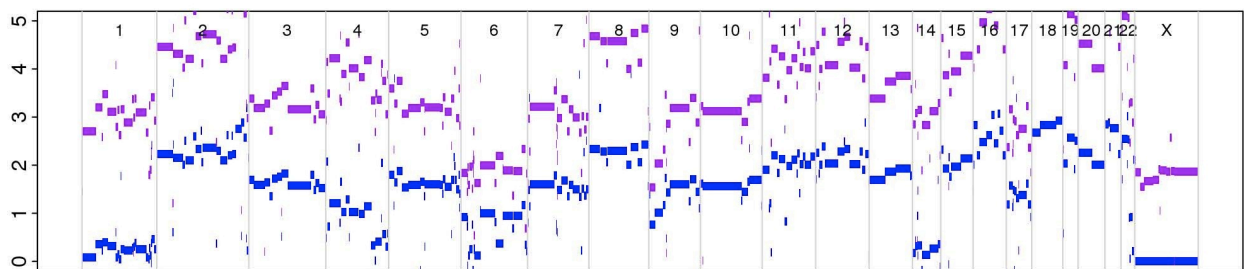



PD6757a

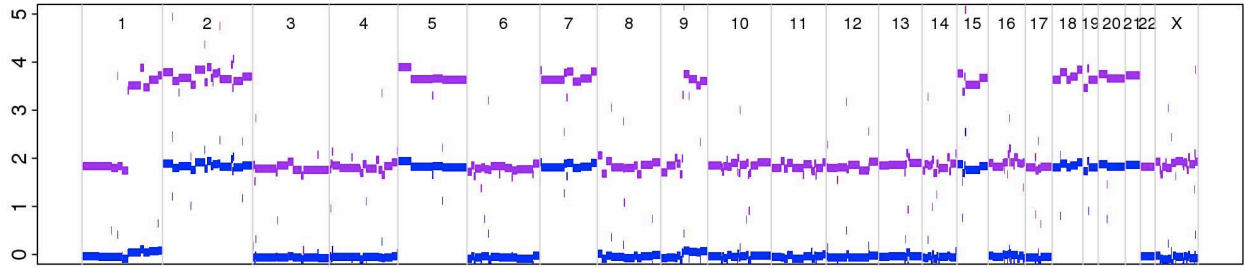

PD6759a

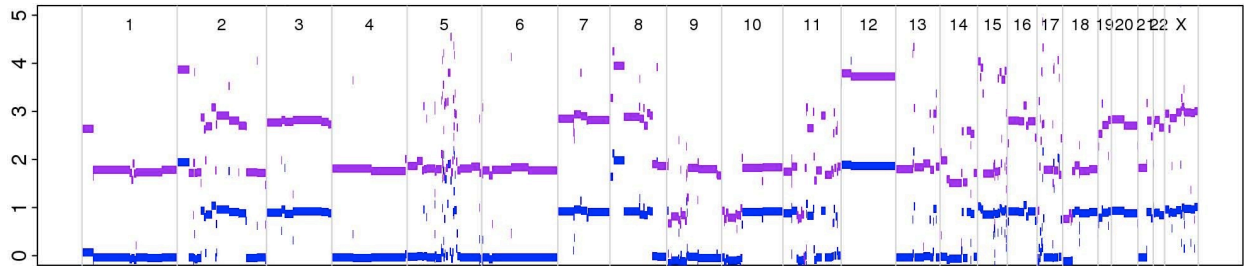

PD6760a

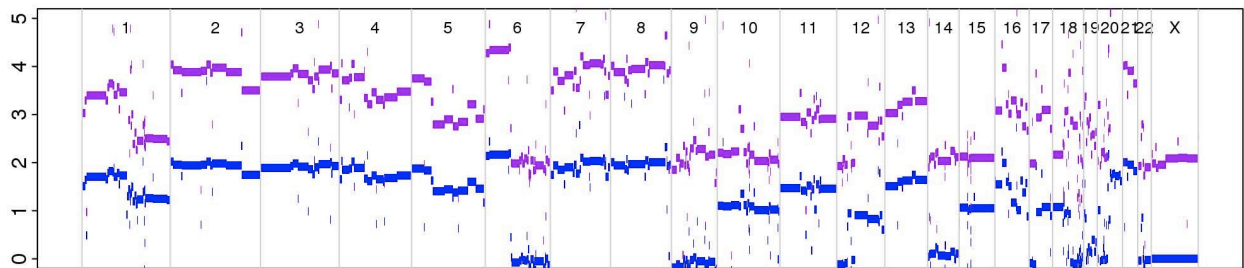

PD6761a

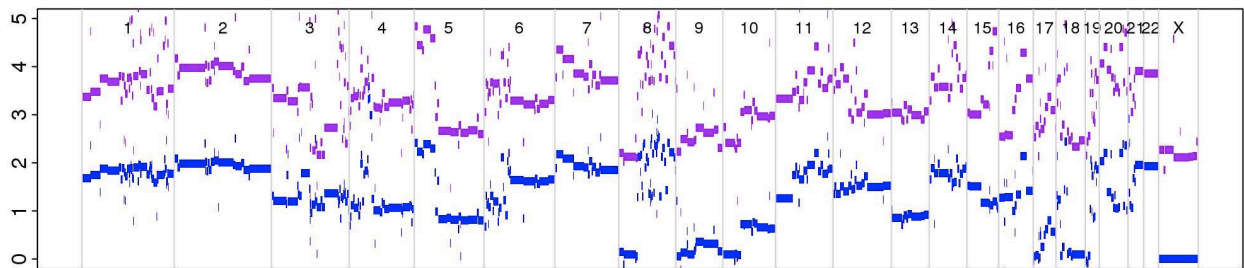

PD6762a

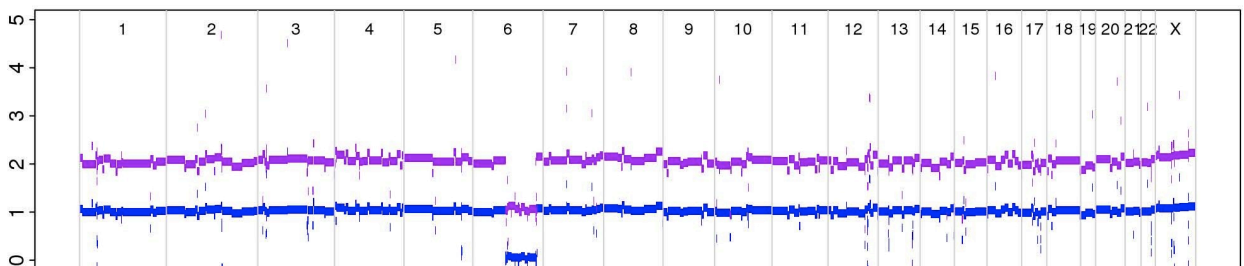

PD6763a

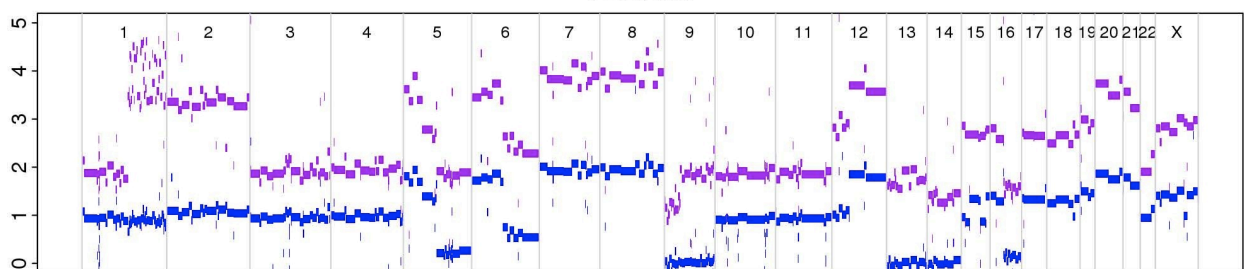

**PD6765a**

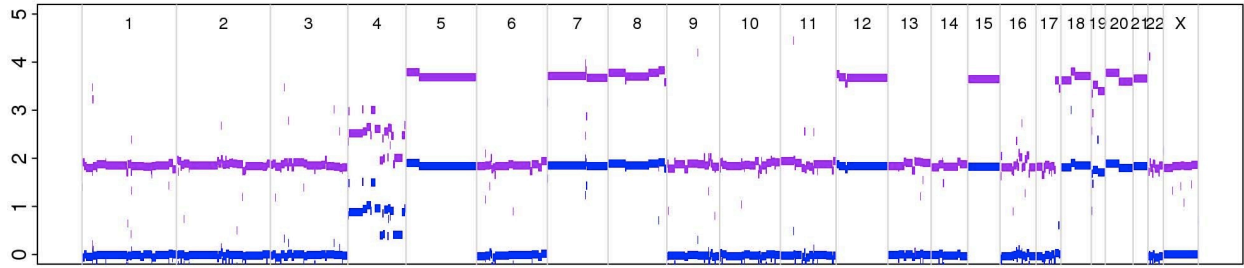

**PD6767a**

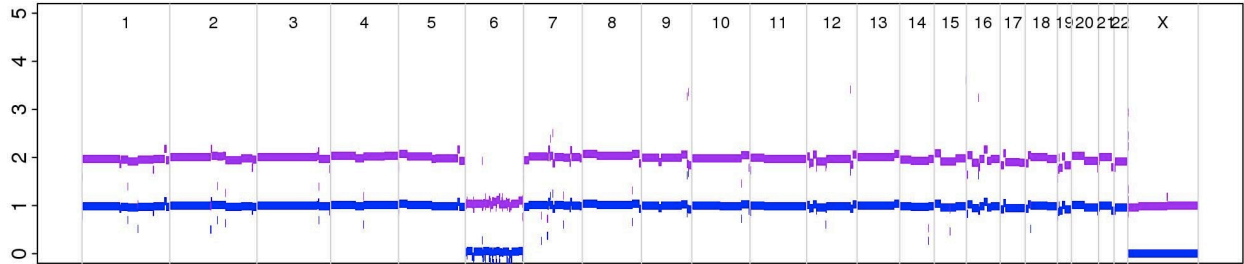

**PD7300a**

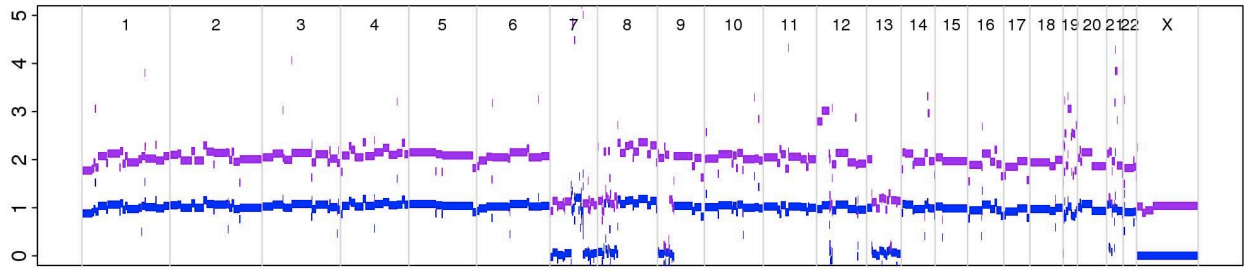

**PD7301a**

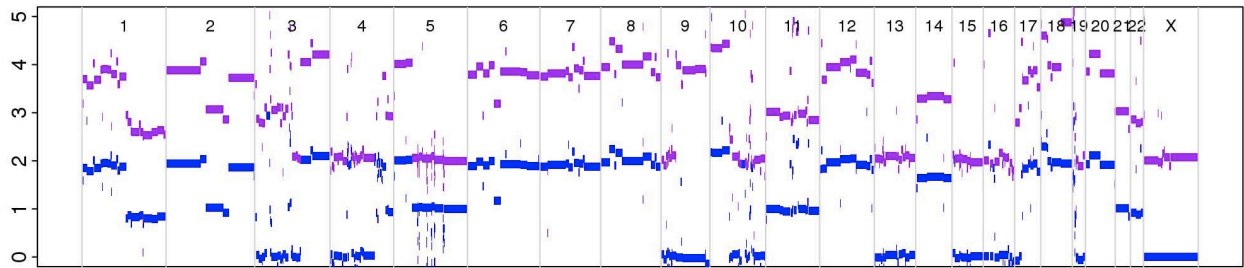

**PD7302a**

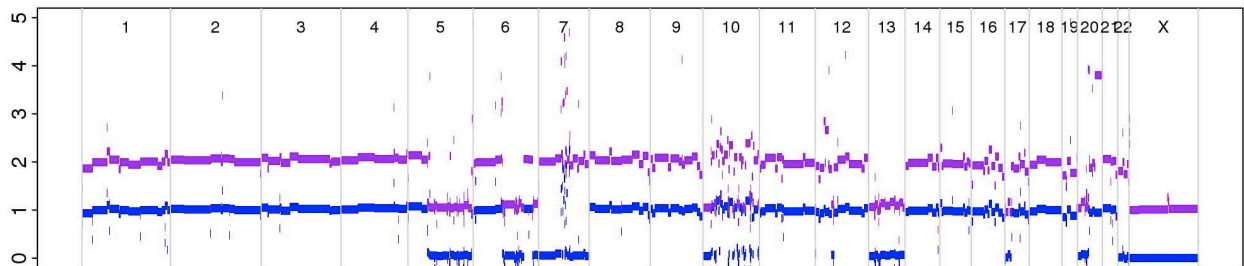

**PD7303a**

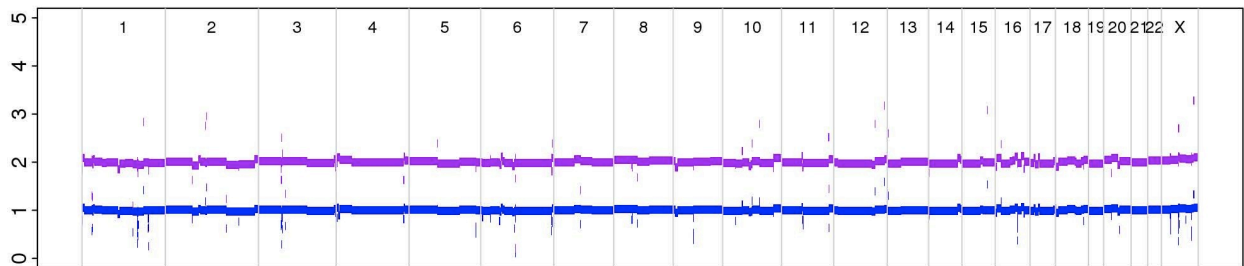

PD6341a

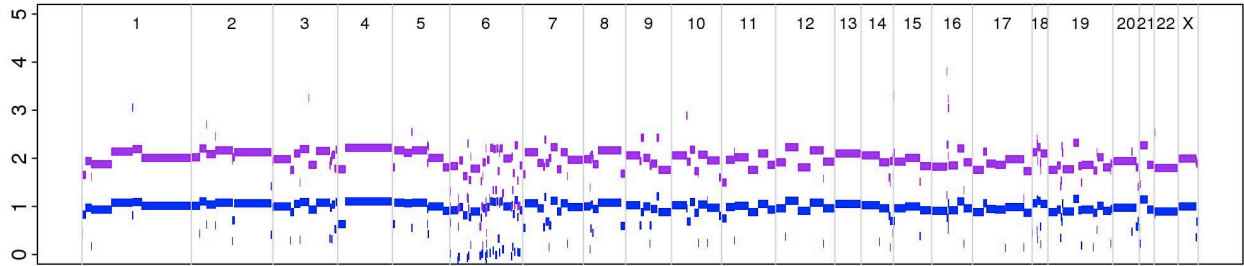

PD6342a

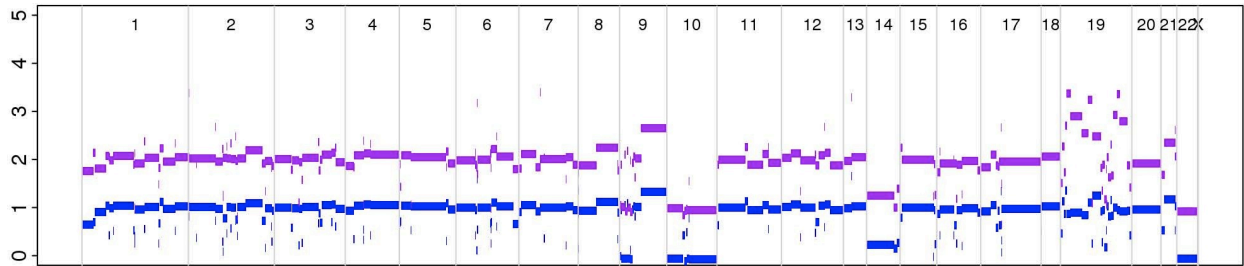

PD6343a

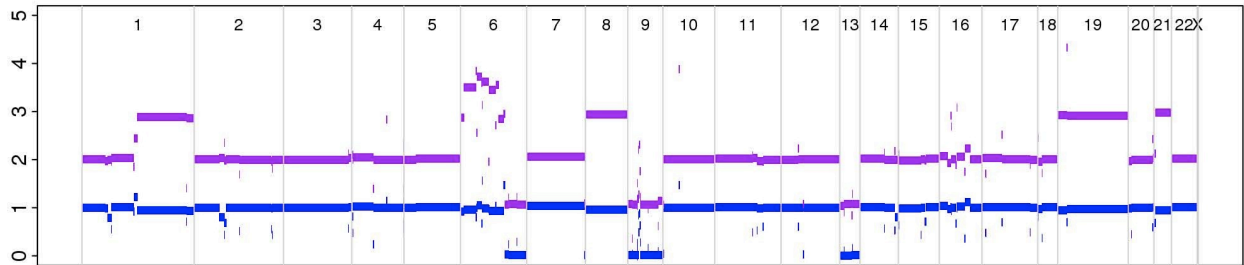

PD6344a

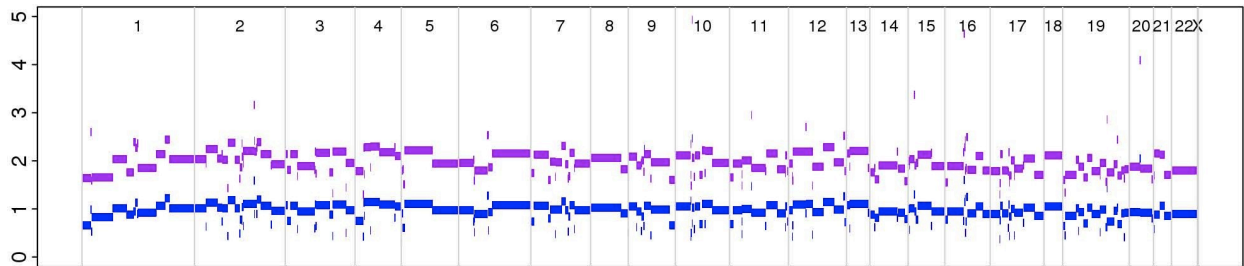

PD6350a

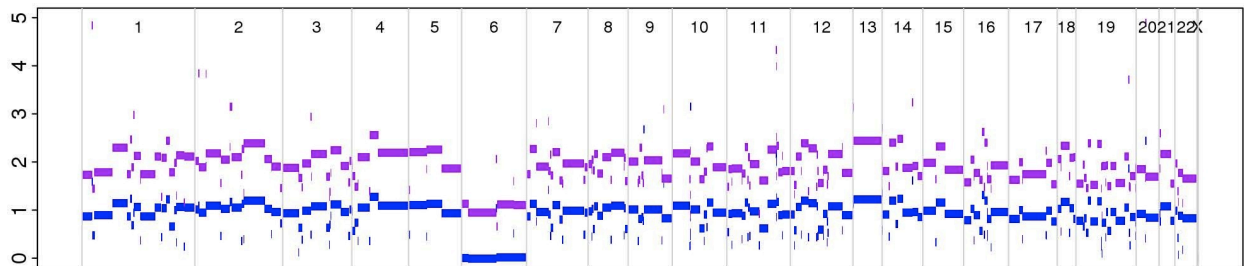

PD6351a

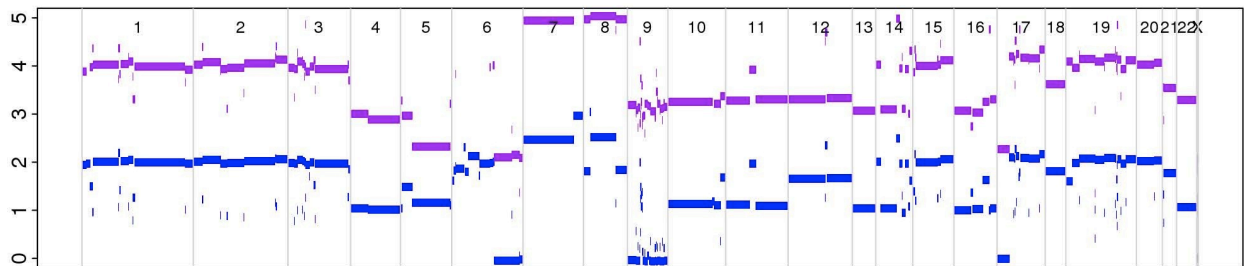



PD6353a

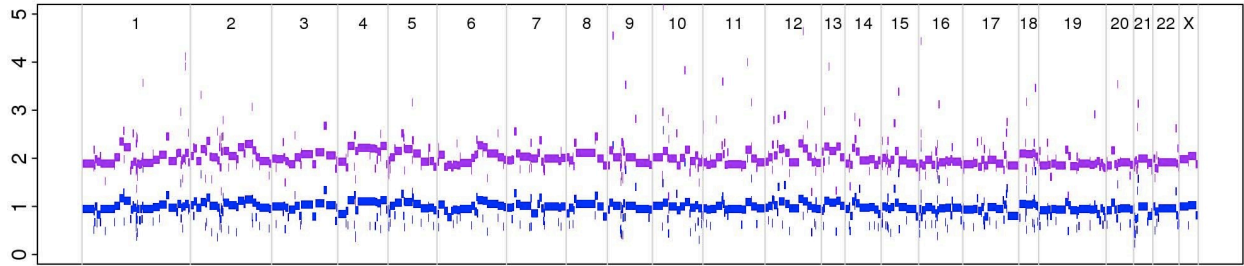

PD6355a

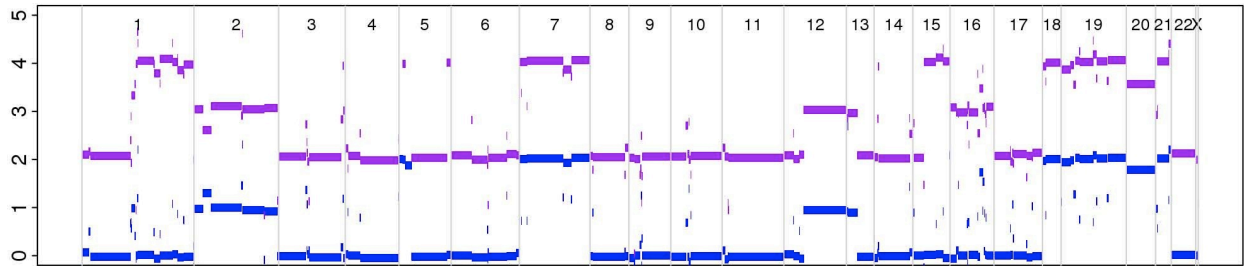

PD6360a

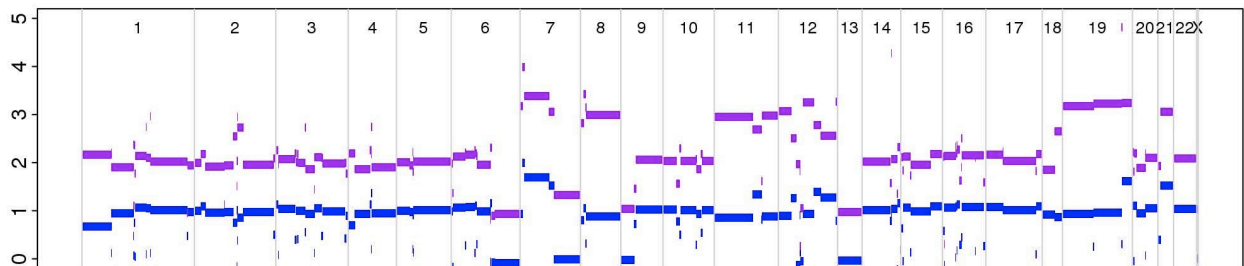

PD6361a

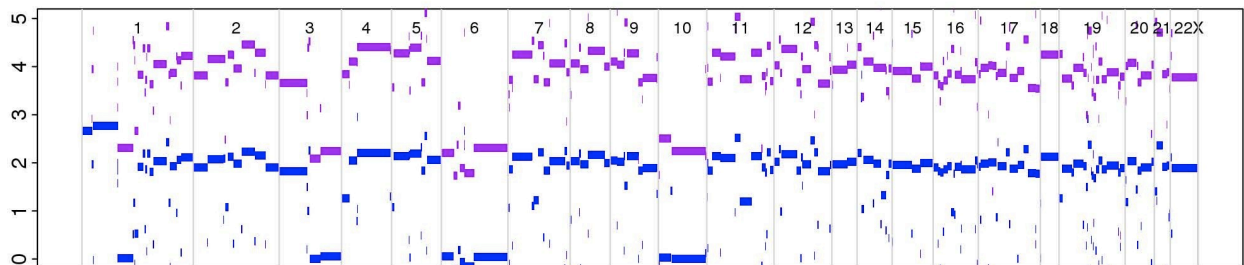

PD6752a

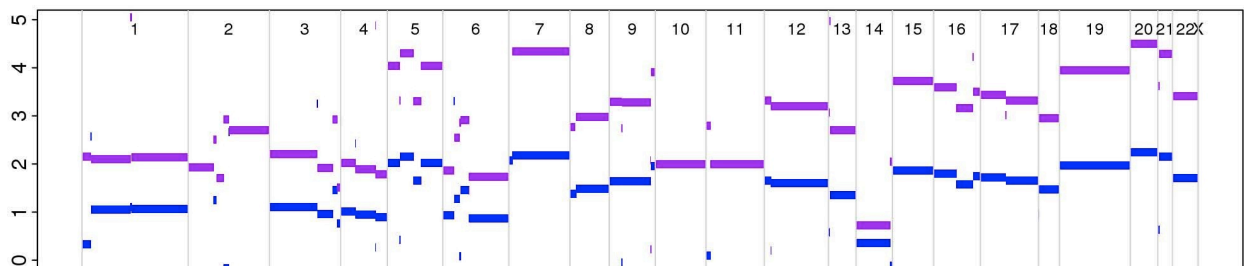

PD6755a

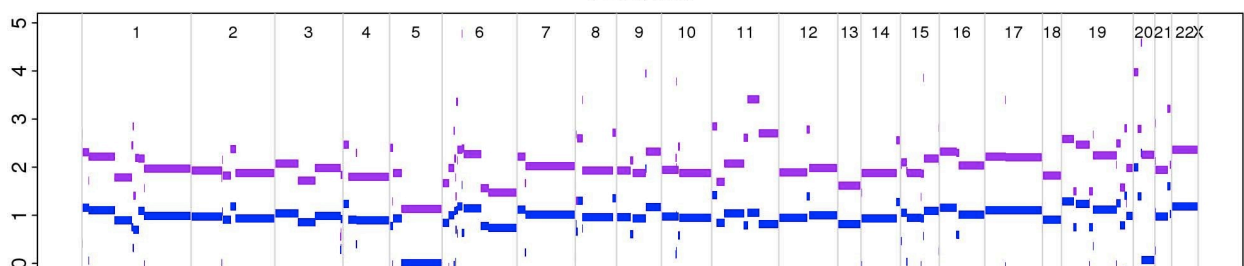

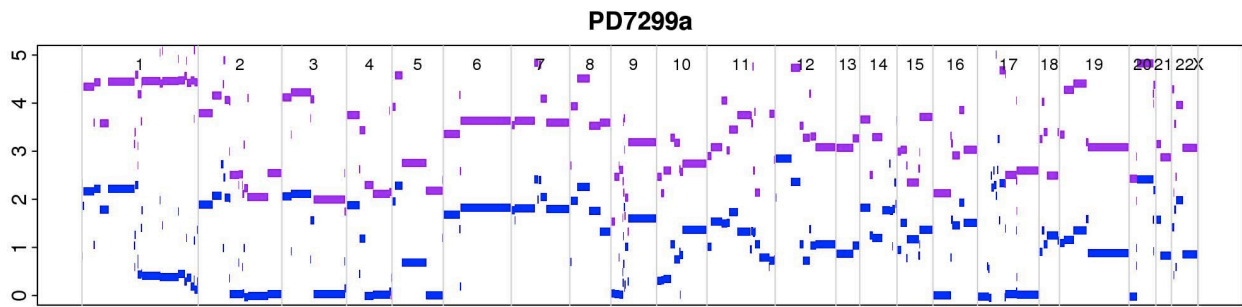

Genome-wide copy number plots of chondrosarcoma tumours. The copy number is presented on the y axis. Purple represents total copy number and blue minor allele copy number.
